# Supplementary material for: Dispersed gold nanoparticles supported in the pores of flower-like macrocellular siliceous foams based on an ionic liquid as catalysts for reduction
Source: Royal Society of Chemistry journal article supplement (doi:10.1039/c6ra10124k), 2016-01-01
Supplement: c6ra10124k1.pdf [file c6ra10124k1.pdf]

### Supporting Information

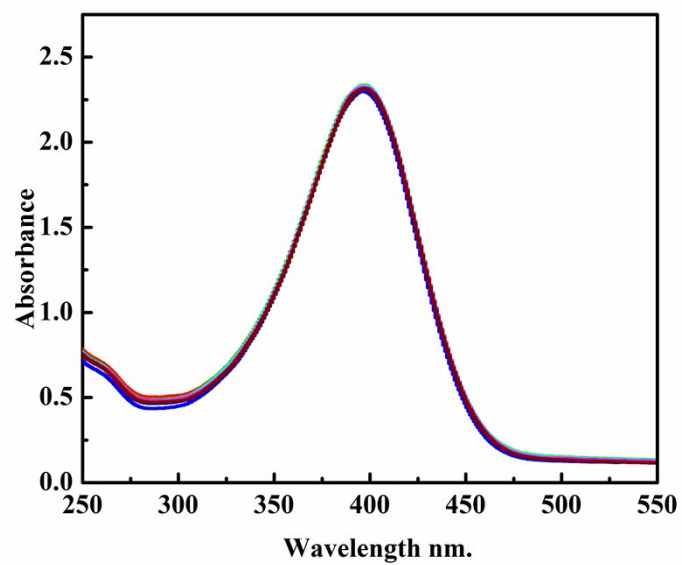

Fig. S1 UV-vis spectra of S-6-393

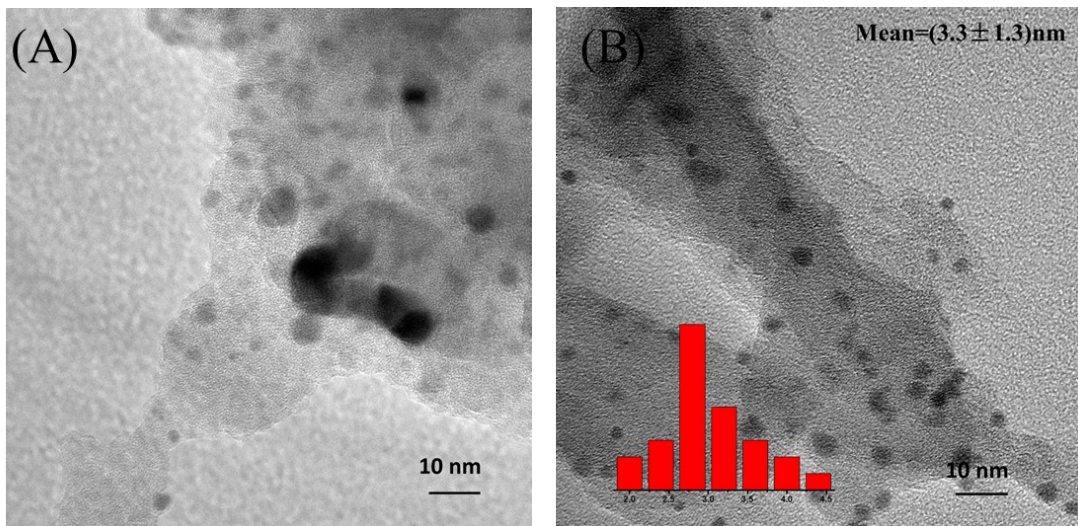

Fig. S2 TEM image of (A) NH<sub>2</sub>-S-6-393/Au used for 5 cycle tests, (B) NH<sub>2</sub>-S-6-393/Au calcined at 343 K
